# Supplementary material for: Brief communication: Updated GAMDAM glacier inventory over high-mountain Asia
Source: Copernicus journal article supplement (doi:10.5194/tc-13-2043-2019), 2019-07-19
Supplement: Supplementary file 1 [file TableS1_gamdam.xls]

## Sheet: TableS1
	Table S1 List of Landsat scenes used to delineate glacier outlines.
				Acquisition date
	Path	Row	Landsat ID	year	month	day
1	130	37	LE71300372002191SGS02	2002	7	10
2	130	37	LT51300372006210IKR00	2006	7	29
3	130	38	LT51300381994241BKT00	1994	8	29
4	130	38	LT51300382000226BJC00	2000	8	13
5	130	38	LT51300382006242IKR00	2006	8	30
6	130	39	LT51300392000226BJC00	2000	8	13
7	130	40	LT51300402006210BJC00	2006	7	29
8	131	38	LE71310382000225SGS00	2000	8	12
9	131	39	LE71310392001227SGS00	2001	8	15
10	131	39	LT51310392000233BJC00	2000	8	20
11	131	39	LT51310392009225BKT00	2009	8	13
12	131	40	LT51310401995219BKT00	1995	8	7
13	131	40	LT51310401999214BKT00	1999	8	2
14	131	40	LT51310402000233BJC00	2000	8	20
15	131	41	LE71310412001227SGS00	2001	8	15
16	131	41	LT51310411994248BJC00	1994	9	5
17	132	34	l71132034_03420020724	2002	7	24
18	132	37	LE71320372000232SGS00	2000	8	19
19	132	38	LT51320382001226BJC00	2001	8	14
20	132	39	LE71320392001298BKT00	2001	10	25
21	132	39	LT51320391992218BJC00	1992	8	5
22	132	39	LT51320391992266BKT00	1992	9	22
23	132	39	LT51320392007195IKR00	2007	7	14
24	132	40	LE71320402001186SGS00	2001	7	5
25	132	40	LT51320401992218BJC00	1992	8	5
26	132	40	LT51320402001226BJC00	2001	8	14
27	132	41	LE71320411999213SGS00	1999	8	1
28	132	41	LT51320412001226BJC00	2001	8	14
29	132	41	LT51320412005285BJC00	2005	10	12
30	133	33	LT51330331997238BJC00	1997	8	26
31	133	33	LT51330332001185BJC01	2001	7	4
32	133	35	LT51330352010226IKR03	2010	8	14
33	133	36	l71133036_03620020816	2002	8	16
34	133	38	LE71330382002196SGS01	2002	7	15
35	133	38	LT51330381993243BJC00	1993	8	31
36	133	40	LT51330401998289BKT00	1998	10	16
37	133	40	LT51330402001185BJC01	2001	7	4
38	133	40	LT51330402009287BJC00	2009	10	14
39	134	33	LT51340332000206BJC00	2000	7	24
40	134	33	LT51340332004217BJC00	2004	8	4
41	134	34	LE71340341999211SGS00	1999	7	30
42	134	34	LE71340342002235SGS00	2002	8	23
43	134	35	l71134035_03519990730	1999	7	30
44	134	37	LT51340372002243BJC02	2002	8	31
45	134	39	LT51340391994269BKT00	1994	9	26
46	134	39	LT51340392005187BJC00	2005	7	6
47	134	39	LT51340392005251BJC02	2005	9	8
48	134	40	LT51340401999267BKT00	1999	9	24
49	134	40	LT51340402005251BJC01	2005	9	8
50	135	33	l71135033_03319990923	1999	9	23
51	135	33	LE71350332001175SGS00	2001	6	24
52	135	33	LT51350332002234BJC01	2002	8	22
53	135	34	l71135034_03420000520	2000	5	20
54	135	35	LE71350352002242SGS00	2002	8	30
55	135	35	LT51350352000245BJC00	2000	9	1
56	135	37	LE71350371999202EDC01	1999	7	21
57	135	37	LE71350372000221SGS00	2000	8	8
58	135	37	LT51350371995247BJC00	1995	9	4
59	135	38	l71135038_03819990923	1999	9	23
60	135	38	LE71350381999202EDC01	1999	7	21
61	135	38	LT51350381998271BJC02	1998	9	28
62	135	39	l71135039_03919990721	1999	7	21
63	135	39	l71135039_03919990923	1999	9	23
64	135	39	LT51350391997236BKT00	1997	8	24
65	135	39	LT51350391999210BKT00	1999	7	29
66	135	39	LT51350392007232BJC00	2007	8	20
67	135	39	LT51350391998271BKT00	1998	9	28
68	135	39	LT51350392003205BJC00	2003	7	24
69	135	39	LT51350392008187BKT00	2008	7	5
70	135	40	LE71350401999266EDC00	1999	9	23
71	135	40	LE71350402013256EDC00	2013	9	13
72	135	40	LT51350402001183BJC01	2001	7	2
73	135	40	LT51350402003205BJC00	2003	7	24
74	135	40	LT51350402006261BJC00	2006	9	18
75	136	24	LT51360242007223IKR00	2007	8	11
76	136	33	l71136033_03320000714	2000	7	14
77	136	33	LT51360332002241BJC01	2002	8	29
78	136	34	LT51360342002241BJC02	2002	8	29
79	136	35	LT51360351995158BJC00	1995	6	7
80	136	37	l71136037_03720000730	2000	7	30
81	136	37	LT51360371995206BJC00	1995	7	25
82	136	38	LE71360382002217SGS00	2002	8	5
83	136	38	LT51360381994267ISP00	1994	9	24
84	136	38	LT51360381995206BJC00	1995	7	25
85	136	38	LT51360381998198BKT00	1998	7	17
86	136	38	LT51360382005249BJC00	2005	9	6
87	136	39	LE71360392001182SGS00	2001	7	1
88	136	39	LE71360392001358SGS00	2001	12	24
89	136	39	LT51360391995206BKT01	1995	7	25
90	136	39	LT51360391999265BKT00	1999	9	22
91	136	39	LT51360392005249BJC00	2005	9	6
92	136	40	l71136040_04020011021	2001	10	21
93	136	40	l71136040_04020011224	2001	12	24
94	136	40	LE71360402003204ASN02	2003	7	23
95	136	40	LT51360401989173BKT00	1989	6	22
96	136	40	LT51360402000204BKT02	2000	7	22
97	136	40	LT51360401999265BKT00	1999	9	22
98	136	40	LT51360402005249BKT01	2005	9	6
99	136	40	LT51360402008290BKT00	2008	10	16
100	136	40	LT51360402009292BKT01	2009	10	19
101	136	41	l71136041_04120011224	2001	12	24
102	136	41	LT51360411990176BKT00	1990	6	25
103	136	41	LT51360411998342BKT00	1998	12	8
104	137	23	LE71370232001221SGS00	2001	8	9
105	137	27	LT51370272005256BJC00	2005	9	13
106	137	33	LE71370332000251SGS00	2000	9	7
107	137	35	LT51370352000243BJC00	2000	8	30
108	137	36	LT51370362000243BJC00	2000	8	30
109	137	37	LT51370372000243BJC00	2000	8	30
110	137	38	LT51370382004254BKT02	2004	9	10
111	137	38	LT51370382007214BKT03	2007	8	2
112	137	39	LT51370391995245BKT00	1995	9	2
113	137	39	LT51370391994194ISP40	1994	7	13
114	137	39	LT51370392004254BKT02	2004	9	10
115	137	40	l71137040_04020010129	2001	1	29
116	137	40	LT51370401999128BKT00	1999	5	8
117	137	40	LT51370401994194ISP40	1994	7	13
118	137	40	LT51370402004254BKT01	2004	9	10
119	137	41	l71137041_04120001228	2000	12	28
120	137	41	LT51370411995245BKT00	1995	9	2
121	137	41	LT51370411994194ISP40	1994	7	13
122	137	41	LT51370411998253BIK00	1998	9	10
123	138	23	LE71380232001212SGS00	2001	7	31
124	138	30	LT51380302006234IKR00	2006	8	22
125	138	33	LT51380331999231BJC00	1999	8	19
126	138	35	LT51380352002207BJC00	2002	7	26
127	138	35	LT51380352002239BJC00	2002	8	27
128	138	36	LT51380361998228BJC00	1998	8	16
129	138	37	LT51380371994217ISP00	1994	8	5
130	138	37	LT51380371994265ISP00	1994	9	22
131	138	38	LT51380381995156BKT00	1995	6	5
132	138	39	LT51380391993198ISP00	1993	7	17
133	138	39	LT51380391994201ISP00	1994	7	20
134	138	39	LT51380391994217BKT01	1994	8	5
135	138	39	LT51380391995156BKT00	1995	6	5
136	138	40	l71138040_04020001219	2000	12	19
137	138	40	LT51380401994185ISP00	1994	7	4
138	138	40	LT51380402006170BKT01	2006	6	19
139	138	41	l71138041_04120011120	2001	11	20
140	138	41	LE71380412000274SGS00	2000	9	30
141	138	41	LT51380411999263BKT00	1999	9	20
142	138	41	LT51380412006170BKT01	2006	6	19
143	138	41	LT51380412009274KHC00	2009	10	1
144	139	30	l71139030_03020020826	2002	8	26
145	139	34	l71139034_03420020826	2002	8	26
146	139	35	LE71390352002238SGS00	2002	8	26
147	139	36	LT51390361994272ISP01	1994	9	29
148	139	37	l71139037_03720011111	2001	11	11
149	139	37	LE71390372002238SGS00	2002	8	26
150	139	39	LT51390391992187ISP00	1992	7	5
151	139	39	LT51390391994192BKT00	1994	7	11
152	139	40	LT51390402007148BKT00	2007	5	28
153	139	41	l71139041_04120001108	2000	11	8
154	139	41	l71139041_04120001226	2000	12	26
155	139	41	LE71390411999262EDC00	1999	9	19
156	139	41	LT51390411994192BKT00	1994	7	11
157	139	41	LT51390412009265KHC00	2009	9	22
158	140	22	LE71400222001242SGS00	2001	8	30
159	140	27	l71140027_02720000827	2000	8	27
160	140	27	l71140027_02720010713	2001	7	13
161	140	33	l71140033_03319990825	1999	8	25
162	140	34	l71140034_03419990825	1999	8	25
163	140	35	l71140035_03519990825	1999	8	25
164	140	36	LT51400361994263ISP00	1994	9	20
165	140	36	LT51400362004259BJC00	2004	9	15
166	140	37	l71140037_03719990825	1999	8	25
167	140	37	l71140037_03720010814	2001	8	14
168	140	38	l71140038_03820001030	2000	10	30
169	140	38	l71140038_03820030414	2003	4	14
170	140	38	LT51400382006200BKT00	2006	7	19
171	140	39	LT51400391999117BKT00	1999	4	27
172	140	39	LT51400391999165BKT00	1999	6	14
173	140	40	l71140040_04020011102	2001	11	2
174	140	40	l71140040_04020020105	2002	1	5
175	140	40	LT51400401998162BKT02	1998	6	11
176	140	40	LT51400401998290BKT00	1998	10	17
177	140	41	l71140041_04120001030	2000	10	30
178	140	41	l71140041_04120020105	2002	1	5
179	140	41	LE71400412001290SGS00	2001	10	17
180	140	41	LT41400411992266XXX02	1992	9	22
181	140	41	LT51400411998162BKT00	1998	6	11
182	140	41	LT51400411999117BKT00	1999	4	27
183	141	26	l71141026_02620020707	2002	7	7
184	141	26	l71141026_02620020808	2002	8	8
185	141	27	l71141027_02720010805	2001	8	5
186	141	27	l71141027_02720020808	2002	8	8
187	141	30	l71141030_03019990901	1999	9	1
188	141	33	l71141033_03320010720	2001	7	20
189	141	34	l71141034_03420010720	2001	7	20
190	141	35	l71141035_03520010720	2001	7	20
191	141	36	LT51410361994254ISP00	1994	9	11
192	141	37	LT51410371996212ISP00	1996	7	30
193	141	38	LT51410381996148BKT00	1996	5	27
194	141	38	LT51410381996212ISP00	1996	7	30
195	141	39	LT51410391999092BKT00	1999	4	2
196	141	39	LT51410392004138BKT00	2004	5	17
197	141	40	l71141040_04020010704	2001	7	4
198	141	40	l71141040_04020011024	2001	10	24
199	141	40	l71141040_04020011227	2001	12	27
200	141	40	LE71410402001265SGS03	2001	9	22
201	141	40	LT51410401994270ISP00	1994	9	27
202	141	40	LT51410401994286ISP00	1994	10	13
203	141	40	LT51410401998169BKT00	1998	6	18
204	141	40	LT51410401999156BKT00	1999	6	5
205	141	41	l71141041_04120011227	2001	12	27
206	141	41	LT51410411994286ISP00	1994	10	13
207	142	26	l71142026_02620020714	2002	7	14
208	142	26	LT51420262006214IKR00	2006	8	2
209	142	27	l71142027_02720020714	2002	7	14
210	142	27	LE71420271999235SGS00	1999	8	23
211	142	30	l71142030_03019990823	1999	8	23
212	142	30	l71142030_03020010711	2001	7	11
213	142	30	LT51420302002235BJC01	2002	8	23
214	142	34	l71142034_03419990823	1999	8	23
215	142	34	l71142034_03420010711	2001	7	11
216	142	35	LT51420351994213ISP00	1994	8	1
217	142	36	LT51420361993242ISP00	1993	8	30
218	142	37	LT51420371994293ISP00	1994	10	20
219	142	38	LT51420381994197ISP00	1994	7	16
220	142	39	l71142039_03920011031	2001	10	31
221	142	39	l71142039_03920030530	2003	5	30
222	142	40	LE71420402001272AGS00	2001	9	29
223	142	40	LT51420401994293ISP00	1994	10	20
224	142	40	LT51420402005291BKT00	2005	10	18
225	142	40	LT51420402010161BKT01	2010	6	10
226	143	24	l71143024_02420010904	2001	9	4
227	143	25	LT51430252002226BJC00	2002	8	14
228	143	25	LT51430252008211BJC00	2008	7	29
229	143	26	l71143026_02620000816	2000	8	16
230	143	26	l71143026_02620010904	2001	9	4
231	143	30	l71143030_03020000917	2000	9	17
232	143	30	LE71430302001167SGS00	2001	6	16
233	143	30	LE71430302002218SGS00	2002	8	6
234	143	30	LT51430302004184BJC00	2004	7	2
235	143	34	LT51430341996258ISP00	1996	9	14
236	143	35	LT51430351996258ISP00	1996	9	14
237	143	36	LT51430361996210ISP00	1996	7	28
238	143	37	LT51430371994268ISP00	1994	9	25
239	143	38	l71143038_03820011022	2001	10	22
240	143	38	LE71430381999194SGS00	1999	7	13
241	143	39	l71143039_03920010920	2001	9	20
242	143	39	LE71430391999194SGS00	1999	7	13
243	143	39	LT51430391994252ISP00	1994	9	9
244	143	39	LT51430391994268ISP00	1994	9	25
245	143	39	LT51430391998247BIK00	1998	9	4
246	143	40	l71143040_04020011209	2001	12	9
247	143	40	LT51430401994252ISP00	1994	9	9
248	143	40	LT51430401998247BIK00	1998	9	4
249	144	25	l71144025_02520000722	2000	7	22
250	144	25	l71144025_02520000807	2000	8	7
251	144	25	LT51440251998238BIK00	1998	8	26
252	144	26	l71144026_02620000807	2000	8	7
253	144	26	LT51440261998238BIK00	1998	8	26
254	144	30	l71144030_03020000807	2000	8	7
255	144	30	l71144030_03020020914	2002	9	14
256	144	31	l71144031_03120000807	2000	8	7
257	144	35	l71144035_03519990922	1999	9	22
258	144	35	LT51440351994211ISP00	1994	7	30
259	144	35	LT51440351994227ISP00	1994	8	15
260	144	36	LT51440361994211ISP00	1994	7	30
261	144	36	LT51440361994259ISP00	1994	9	16
262	144	37	LT51440371994211ISP00	1994	7	30
263	144	37	LT51440371994259ISP00	1994	9	16
264	144	38	l71144038_03820011013	2001	10	13
265	144	38	LT51440382009188KHC00	2009	7	7
266	144	39	l71144039_03920011013	2001	10	13
267	144	39	LE71440391999265SGS01	1999	9	22
268	144	39	LE71440392000220SGS00	2000	8	7
269	144	39	LE71440392001238SGS00	2001	8	26
270	145	24	LT51450242008209KHC01	2008	7	27
271	145	25	LT51450252008209KHC01	2008	7	27
272	145	26	LT51450261996224ISP00	1996	8	11
273	145	27	l72145027_02720000814	2000	8	14
274	145	29	LE71450292002200SGS00	2002	7	19
275	145	29	LT51450291998245BIK00	1998	9	2
276	145	29	LT51450292007222IKR00	2007	8	10
277	145	30	LE71450302002232SGS00	2002	8	20
278	145	30	LT51450301994234ISP00	1994	8	22
279	145	30	LT51450302007222IKR00	2007	8	10
280	145	31	l71145031_03120010411	2001	4	11
281	145	31	LT51450311998245BIK00	1998	9	2
282	145	35	LT51450351994234ISP00	1994	8	22
283	145	35	LT51450351996256ISP00	1996	9	12
284	145	36	LT51450361994266ISP00	1994	9	23
285	145	36	LT51450361996256ISP00	1996	9	12
286	145	37	l71145037_03720011020	2001	10	20
287	145	37	LE71450372001261SGS00	2001	9	18
288	145	37	LT51450371993231ISP00	1993	8	19
289	145	38	l71145038_03820011020	2001	10	20
290	145	38	LE71450381999208EDC00	1999	7	27
291	145	39	l71145039_03920010801	2001	8	1
292	145	39	l71145039_03920011020	2001	10	20
293	145	39	LT51450391994266ISP00	1994	9	23
294	146	25	l71146025_02519990803	1999	8	3
295	146	25	l71146025_02520000906	2000	9	6
296	146	29	l71146029_02920010808	2001	8	8
297	146	30	l71146030_03020000805	2000	8	5
298	146	30	l71146030_03020010808	2001	8	8
299	146	31	l71146031_03120000805	2000	8	5
300	146	31	LT51460311997233ISP00	1997	8	21
301	146	35	LT51460351996231ISP00	1996	8	18
302	146	35	LT51460351997233ISP00	1997	8	21
303	146	36	l71146036_03620001008	2000	10	8
304	146	36	LT51460361994273ISP00	1994	9	30
305	146	36	LT51460361998236BIK04	1998	8	24
306	146	37	l71146037_03720001008	2000	10	8
307	146	37	LT51460371998236BIK04	1998	8	24
308	146	37	LT51460372009250KHC00	2009	9	7
309	146	38	l71146038_03820010909	2001	9	9
310	146	38	l71146038_03820021201	2002	12	1
311	146	38	LE71460382000218SGS00	2000	8	5
312	146	38	LT51460381998236BIK04	1998	8	24
313	146	39	LE71460392000218SGS00	2000	8	5
314	146	39	LT51460391994273ISP00	1994	9	30
315	147	28	l71147028_02819990826	1999	8	26
316	147	28	l71147028_02820000727	2000	7	27
317	147	29	l71147029_02919990826	1999	8	26
318	147	29	LT51470292006233IKR00	2006	8	21
319	147	30	l71147030_03020020818	2002	8	18
320	147	31	l71147031_03120020818	2002	8	18
321	147	31	LT51470311996254ISP00	1996	9	10
322	147	31	LT51470312007236IKR00	2007	8	24
323	147	31	LT51470312008223KHC01	2008	8	10
324	147	35	l71147035_03519990709	1999	7	9
325	147	35	l71147035_03520001031	2000	10	31
326	147	35	LE71470352002214SGS00	2002	8	2
327	147	35	LT51470351994232ISP00	1994	8	20
328	147	35	LT51470351996254ISP00	1996	9	10
329	147	36	l71147036_03620000828	2000	8	28
330	147	36	l71147036_03620001031	2000	10	31
331	147	36	l71147036_03620020802	2002	8	2
332	147	37	l71147037_03720001015	2000	10	15
333	147	37	l71147037_03720020802	2002	8	2
334	147	37	LE71470372000241SGS00	2000	8	28
335	147	37	LT51470372001251SGI00	2001	9	8
336	147	38	l71147038_03820011018	2001	10	18
337	147	38	LE71470382002214SGS00	2002	8	2
338	148	28	l71148028_02820010822	2001	8	22
339	148	29	l71148029_02919990918	1999	9	18
340	148	29	l72148029_02920000904	2000	9	4
341	148	30	l71148030_03019990918	1999	9	18
342	148	30	l71148030_03020020825	2002	8	25
343	148	31	l71148031_03119990918	1999	9	18
344	148	31	l71148031_03120020724	2002	7	24
345	148	31	l71148031_03120020825	2002	8	25
346	148	32	LT51480321997199ISP00	1997	7	18
347	148	34	l71148034_03419990918	1999	9	18
348	148	34	LT51480341994191ISP40	1994	7	10
349	148	34	LT51480341994239ISP00	1994	8	27
350	148	34	LT51480341997199ISP00	1997	7	18
351	148	34	LT51480341997263ISP00	1997	9	20
352	148	35	l71148035_03519991223	1999	12	23
353	148	35	l71148035_03520000904	2000	9	4
354	148	35	l71148035_03520010721	2001	7	21
355	148	35	l71148035_03520010923	2001	9	23
356	148	35	LT51480351999221XXX01	1999	8	9
357	148	36	l71148036_03620000904	2000	9	4
358	148	36	LT51480361997263ISP00	1997	9	20
359	148	36	LT51480362000240XXX02	2000	8	27
360	148	37	l71148037_03719990817	1999	8	17
361	148	37	l71148037_03720001022	2000	10	22
362	148	37	LE71480372000248SGS00	2000	9	4
363	149	30	l71149030_03019990808	1999	8	8
364	149	30	l71149030_03019990909	1999	9	9
365	149	30	l71149030_03020021003	2002	10	3
366	149	31	LT51490311994230ISP00	1994	8	18
367	149	31	LT51490311994246ISP00	1994	9	3
368	149	32	LT51490321994230ISP00	1994	8	18
369	149	32	LT51490321999228AAA02	1999	8	16
370	149	33	LE71490331999268EDC00	1999	9	25
371	149	33	LT51490331994182ISP00	1994	7	1
372	149	34	l71149034_03420000911	2000	9	11
373	149	34	l71149034_03420010930	2001	9	30
374	149	34	LE71490341999268EDC00	1999	9	25
375	149	34	LT51490341994246ISP00	1994	9	3
376	149	34	LT51490341998225XXX01	1998	8	13
377	149	35	l71149035_03520000911	2000	9	11
378	149	35	l71149035_03520020816	2002	8	16
379	149	35	LT51490351997222SGI00	1997	8	10
380	149	35	LT51490351998241BIK03	1998	8	29
381	149	36	l71149036_03620000826	2000	8	26
382	149	36	l71149036_03620000911	2000	9	11
383	149	36	l71149036_03620010930	2001	9	30
384	149	36	l71149036_03620021003	2002	10	3
385	149	36	LE71490362001241SGS00	2001	8	29
386	149	36	LT51490361997222SGI00	1997	8	10
387	149	37	l71149037_03720000911	2000	9	11
388	149	37	LE71490371999236EDC00	1999	8	24
389	150	30	l71150030_03019990916	1999	9	16
390	150	31	l71150031_03119990916	1999	9	16
391	150	31	l71150031_03120010820	2001	8	20
392	150	32	l71150032_03220010820	2001	8	20
393	150	32	l71150032_03220020924	2002	9	24
394	150	32	LE71500322000246SGS01	2000	9	2
395	150	32	LE71500322002235SGS00	2002	8	23
396	150	32	LT51500321998296XXX00	1998	10	23
397	150	33	l71150033_03320000902	2000	9	2
398	150	33	l71150033_03320011007	2001	10	7
399	150	33	LE71500332000198SGS00	2000	7	16
400	150	34	l71150034_03420000902	2000	9	2
401	150	34	l71150034_03420011007	2001	10	7
402	150	34	l71150034_03420020823	2002	8	23
403	150	35	l71150035_03519990916	1999	9	16
404	150	35	LT51500352001192SGI00	2001	7	11
405	150	35	LT51500352008212KHC01	2008	7	30
406	150	36	l71150036_03619990815	1999	8	15
407	150	36	l71150036_03620001004	2000	10	4
408	150	36	l71150036_03620001105	2000	11	5
409	150	36	l71150036_03620011007	2001	10	7
410	151	30	l71151030_03020000824	2000	8	24
411	151	30	LT51510301994244ISP00	1994	9	1
412	151	31	l71151031_03120000824	2000	8	24
413	151	31	LT51510311996266ISP00	1996	9	22
414	151	32	l71151032_03220000824	2000	8	24
415	151	33	l71151033_03320000824	2000	8	24
416	151	33	l71151033_03320010726	2001	7	26
417	151	33	l71151033_03320010928	2001	9	28
418	151	34	l71151034_03420000824	2000	8	24
419	151	34	l71151034_03420010928	2001	9	28
420	151	34	l71151034_03420020830	2002	8	30
421	151	35	l71151035_03520000909	2000	9	9
422	151	35	l71151035_03520020830	2002	8	30
423	151	35	l71151035_03520021102	2002	11	2
424	151	35	LT51510351998271BIK02	1998	9	28
425	151	36	l71151036_03620020915	2002	9	15
426	152	30	l71152030_03020000730	2000	7	30
427	152	30	LT51520301998246BIK01	1998	9	3
428	152	30	LT51520301999233XXX02	1999	8	21
429	152	31	l71152031_03120010802	2001	8	2
430	152	31	LT51520311998246BIK02	1998	9	3
431	152	31	LT51520311999233XXX02	1999	8	21
432	152	32	l71152032_03220000916	2000	9	16
433	152	32	l71152032_03220010802	2001	8	2
434	152	33	l71152033_03320000916	2000	9	16
435	152	33	l71152033_03320020805	2002	8	5
436	152	34	l71152034_03420010802	2001	8	2
437	152	34	l71152034_03420011005	2001	10	5
438	152	34	l71152034_03420020922	2002	9	22
439	152	35	l71152035_03520010802	2001	8	2
440	152	36	l71152036_03620020922	2002	9	22
441	153	31	l71153031_03120000923	2000	9	23
442	153	31	LT51530312000259XXX02	2000	9	15
443	153	32	l71153032_03219990820	1999	8	20
444	153	32	l71153032_03220000822	2000	8	22
445	153	32	l71153032_03220000923	2000	9	23
446	153	32	l71153032_03220010708	2001	7	8
447	153	33	l71153033_03320000822	2000	8	22
448	153	33	l71153033_03320000923	2000	9	23
449	153	35	l71153035_03520010825	2001	8	25
450	153	36	l71153036_03620010825	2001	8	25
451	154	32	l71154032_03220000829	2000	8	29
452	154	33	l71154033_03320000829	2000	8	29
453	154	33	l71154033_03320010731	2001	7	31
