# Supplementary material for: Brief communication: Updated GAMDAM glacier inventory over high-mountain Asia
Source: Copernicus journal article supplement (doi:10.5194/tc-13-2043-2019), 2019-07-19
Supplement: Supplementary file 1 [file tc-13-2043-2019-supplement.zip]

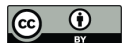

## *Supplement of*

# **Brief communication: Updated GAMDAM glacier inventory over high-mountain Asia**

**Akiko Sakai**

*Correspondence to:* Akiko Sakai (shakai@nagoya-u.jp)

- tc-13-2043-2019-supplement-title-page.pdf
- Supplement\_updated\_ggi20190624.pdf
- TableS1\_gamdams.xls

The copyright of individual parts of the supplement might differ from the CC BY 4.0 License.
