# Supplementary material for: Brief communication: Updated GAMDAM glacier inventory over high-mountain Asia
Source: Copernicus journal article supplement (doi:10.5194/tc-13-2043-2019), 2019-07-19
Supplement: Supplementary file 2 [file tc-13-2043-2019-supplement.zip]

Archive with 3 entries (3 files):
- Supplement_updated_ggi20190624.pdf
- TableS1_gamdam.xls
- tc-13-2043-2019-supplement-title-page.pdf
